# Supplementary material for: Prevalence of pathogenic germline variants in the circulating tumor DNA testing
Source: Springer Nature journal article supplement (doi:10.1007/s10147-022-02220-x), 2022-07-23
Supplement: MOESM1 [file 23297282]

## Supplementary Figure S1

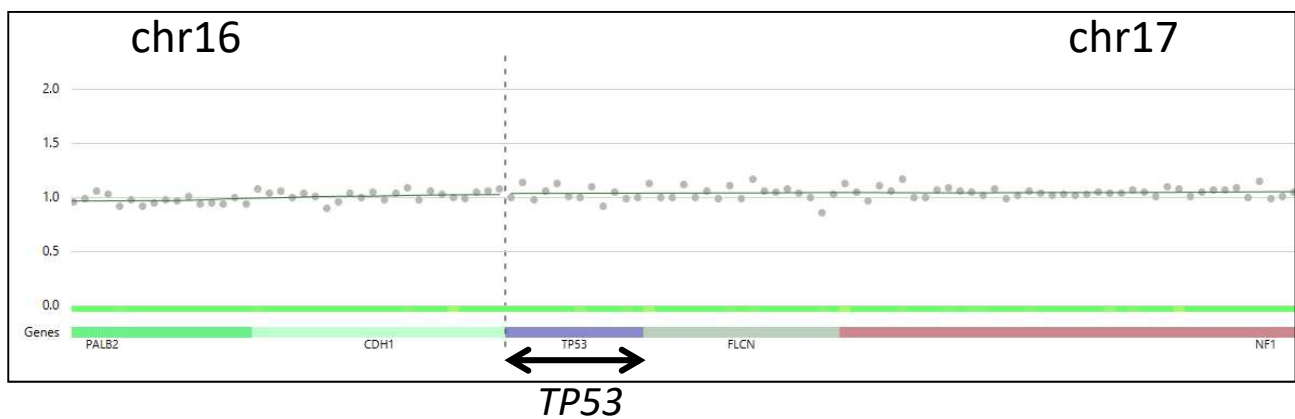

The result of copy number analysis in germline sequencing of the patient with *TP53* C238Y variant.
