# Supplementary material for: Prevalence of pathogenic germline variants in the circulating tumor DNA testing
Source: Springer Nature journal article supplement (doi:10.1007/s10147-022-02220-x), 2022-07-23
Supplement: MOESM2 [file 23297282]

**Supplementary Table 1. Target genes in confirmatory germline sequencing.**

| <b>Guardant360 target genes</b> | <b>covered by HCGP or CHP</b> |
|---------------------------------|-------------------------------|
| AKT1                            | CHP                           |
| ALK                             | CHP                           |
| APC                             | HCGP, CHP                     |
| ATM                             | HCGP, CHP                     |
| BRAF                            | CHP                           |
| BRCA1                           | HCGP                          |
| BRCA2                           | HCGP                          |
| CDH1                            | HCGP, CHP                     |
| CDK4                            | HCGP                          |
| CDKN2A                          | HCGP, CHP                     |
| CTNNB1                          | CHP                           |
| EGFR                            | CHP                           |
| ERBB2                           | CHP                           |
| EZH2                            | CHP                           |
| FBXW7                           | CHP                           |
| FGFR1                           | CHP                           |
| FGFR2                           | CHP                           |
| FGFR3                           | CHP                           |
| GNA11                           | CHP                           |
| GNAQ                            | CHP                           |
| GNAS                            | CHP                           |
| HNF1A                           | CHP                           |
| HRAS                            | CHP                           |
| IDH1                            | CHP                           |
| JAK2                            | CHP                           |
| JAK3                            | CHP                           |
| KIT                             | CHP                           |
| KRAS                            | CHP                           |
| MET                             | HCGP, CHP                     |
| MLH1                            | HCGP, CHP                     |
| MPL                             | CHP                           |
| NF1                             | HCGP                          |
| NOTCH1                          | CHP                           |
| NPM1                            | CHP                           |
| NRAS                            | CHP                           |
| PDGFRA                          | CHP                           |
| PIK3CA                          | CHP                           |
| PTEN                            | HCGP, CHP                     |
| PTPN11                          | CHP                           |
| RB1                             | HCGP, CHP                     |
| RET                             | HCGP, CHP                     |
| SMAD4                           | HCGP, CHP                     |
| SMO                             | CHP                           |
| STK11                           | HCGP, CHP                     |
| TP53                            | HCGP, CHP                     |
| TSC1                            | HCGP                          |
| VHL                             | HCGP, CHP                     |

Abbreviations: HCGP, hereditary cancer-associated gene panel; CHP, Ion AmpliSeq cancer hotspot panel v2
